# Supplementary material for: Correlation of APE1 with VEGFA and CD163+ macrophage infiltration in bladder cancer and their prognostic significance
Source: PubMed Central journal article supplement — Oncol Lett. 2020 Jul 6;20(3):2881–7. doi: 10.3892/ol.2020.11814 (PMC7401005; doi:10.3892/ol.2020.11814), 2020-07-06
Supplement: Supplementary_Data.pdf [file Supplementary_Data.pdf]

Table SI. Clinicopathological characteristics of 127 patients with bladder urothelial cancer treated by cystectomy.

| Feature                 | Value       |
|-------------------------|-------------|
| Age (years)             |             |
| Median (range)          | 64 (39-88)  |
| ≤65                     | 73 (57.48)  |
| >65                     | 54 (42.52)  |
| Sex                     |             |
| Male                    | 113 (88.98) |
| Female                  | 14 (11.02)  |
| Smoking history         |             |
| Yes                     | 68 (53.54)  |
| No                      | 59 (46.46)  |
| Clinical stage          |             |
| pTis/pTa                | 8 (6.30)    |
| pT1                     | 37 (29.13)  |
| pT2                     | 34 (26.77)  |
| pT3                     | 36 (28.35)  |
| pT4                     | 12 (9.45)   |
| pN stage                |             |
| pN0                     | 106 (83.46) |
| pN1                     | 15 (11.81)  |
| pN2+                    | 6 (4.72)    |
| NMIBC (≤pT1)            | 45 (35.43)  |
| MIBC (>pT1)             | 82 (64.57)  |
| Pathological grade      |             |
| Low                     | 11 (8.67)   |
| High                    | 116 (91.33) |
| Lymphovascular invasion |             |
| Yes                     | 38 (29.92)  |
| No                      | 89 (70.08)  |
| APE1 grade              |             |
| 0                       | 6 (4.72)    |
| 1                       | 18 (14.17)  |
| 2                       | 40 (31.50)  |
| 3                       | 63 (49.61)  |
| VEGFA grade             |             |
| 0                       | 29 (22.83)  |
| 1                       | 31 (24.40)  |
| 2                       | 48 (37.80)  |
| 3                       | 19 (14.96)  |
| CD163 grade             |             |
| 0 (<10%)                | 11 (8.66)   |
| 1 (10-20%)              | 54 (42.52)  |
| 2 (21-50%)              | 34 (26.77)  |
| 3 (>50%)                | 28 (22.05)  |

Values are expressed as n (%) unless otherwise specified. VEGFA, vascular endothelial growth factor A; APE1, apurinic/apyrimidinic endodeoxyribonuclease 1; NMIBC, non-muscle invasive bladder cancer.

Table SII. Association of immunohistochemistry marker expression with clinicopathological parameters.

| Protein/expression status | Stage |      |         | Grade |      |         | LVI |    |         |
|---------------------------|-------|------|---------|-------|------|---------|-----|----|---------|
|                           | NMIBC | MIBC | P-value | Low   | High | P-value | Yes | No | P-value |
| APE1                      |       |      | 0.711   |       |      | 0.744   |     |    | 0.019   |
| Low                       | 24    | 40   |         | 6     | 58   |         | 12  | 52 |         |
| High                      | 21    | 42   |         | 4     | 59   |         | 24  | 39 |         |
| VEGFA                     |       |      | 0.355   |       |      | 0.748   |     |    | 0.554   |
| Low                       | 24    | 36   |         | 4     | 56   |         | 15  | 45 |         |
| High                      | 21    | 46   |         | 6     | 61   |         | 21  | 46 |         |
| CD163                     |       |      | 0.197   |       |      | 0.054   |     |    | n/a     |
| Low                       | 26    | 37   |         | 8     | 55   |         | 18  | 45 |         |
| High                      | 19    | 45   |         | 2     | 62   |         | 18  | 46 |         |

VEGFA, vascular endothelial growth factor A; APE1, apurinic/aprimidinic endodeoxyribonuclease 1; NMIBC, non-muscle invasive bladder cancer; LVI, lymphovascular invasion.

Table SIII. Correlation of APE1 and VEGFA expression with CD163<sup>+</sup> macrophage infiltration in bladder cancers.

| Protein/statistic | APE1  | VEGFA  | CD163  |
|-------------------|-------|--------|--------|
| APE1              |       |        |        |
| r value           | 1.000 | 0.208  | 0.196  |
| P-value           |       | 0.018  | 0.027  |
| VEGFA             |       |        |        |
| r value           | 0.208 | 1.000  | 0.408  |
| P-value           | 0.018 |        | <0.001 |
| CD163             |       |        |        |
| r value           | 0.196 | 0.408  | 1.000  |
| P-value           | 0.027 | <0.001 |        |

VEGFA, vascular endothelial growth factor A; APE1, apurinic/apyrimidinic endodeoxyribonuclease 1.

Table SIV. Correlation of APE1, VEGFA and CD163 expression in muscle invasive bladder cancer tissues with multiple immunofluorescence staining.

| Factor 1   | Factor 2         | R         | P-value               |
|------------|------------------|-----------|-----------------------|
| Tumor APE1 | Stroma CD163     | 0.9090909 | $5.55 \times 10^{-5}$ |
| Tumor APE1 | Intratumor CD163 | 0.8363636 | 0.002564662           |
| Tumor APE1 | Total CD163      | 0.8363636 | 0.002564662           |
| Tumor APE1 | Tumor VEGFA      | 0.6545455 | 0.03382516            |
| Tumor APE1 | Stroma CD34      | 0.6363636 | 0.0403864             |

VEGFA, vascular endothelial growth factor A; APE1, apurinic/apyrimidinic endodeoxyribonuclease 1.

Table SV. Area under the curve for ROC analysis.

| Test result variable(s) | Area  | Std. error | Asymptotic sig. | Asymptotic 95% CI |                |
|-------------------------|-------|------------|-----------------|-------------------|----------------|
|                         |       |            |                 | Lower boundary    | Upper boundary |
| APE_VEGF_CD163_T_N      | 0.867 | 0.036      | 0.000           | 0.797             | 0.936          |
| APE1_T_N                | 0.824 | 0.039      | 0.000           | 0.747             | 0.901          |
| T_N                     | 0.773 | 0.042      | 0.000           | 0.690             | 0.856          |
| T_N_APE1_CD163          | 0.849 | 0.038      | 0.000           | 0.775             | 0.923          |
| APE1_CD163_VEGF         | 0.727 | 0.048      | 0.000           | 0.634             | 0.820          |

Comparing area under the curve for multiple combination of variables. ROC, receiver operating characteristics; Std., standard; sig., significance; VEGFA, vascular endothelial growth factor A; APE1, apurinic/aprimidinic endodeoxyribonuclease 1; CI, confidence intervals.
